# Supplementary material for: Effect of Acupotomy on FAK-PI3K Signaling Pathways in KOA Rabbit Articular Cartilages
Source: Evid Based Complement Alternat Med. 2017 Oct 12;2017:4535326. doi: 10.1155/2017/4535326 (PMC5660818; doi:10.1155/2017/4535326)
Supplement: Supplementary file 1 — Animal Experimental Ethical Inspection Form, Beijing University of Chinese Medicine. [file 4535326.f1.pdf]

# Animal Experimental Ethical Inspection Form of Beijing University of Chinese Medicine

No.: Kj-dw-18-20150604-01

|                                                                                                                                                                                                                                                                                                                                                                                                                                                                                              |                                                                                                                                                                                                                                                                                                                                                                                                                                                                                                                                                                                             |                                                                           |                                |                                   |                                                                                                                                                                                                        |  |
|----------------------------------------------------------------------------------------------------------------------------------------------------------------------------------------------------------------------------------------------------------------------------------------------------------------------------------------------------------------------------------------------------------------------------------------------------------------------------------------------|---------------------------------------------------------------------------------------------------------------------------------------------------------------------------------------------------------------------------------------------------------------------------------------------------------------------------------------------------------------------------------------------------------------------------------------------------------------------------------------------------------------------------------------------------------------------------------------------|---------------------------------------------------------------------------|--------------------------------|-----------------------------------|--------------------------------------------------------------------------------------------------------------------------------------------------------------------------------------------------------|--|
| Concerned information wrote by applicant                                                                                                                                                                                                                                                                                                                                                                                                                                                     | Applicant: Ma Shining                                                                                                                                                                                                                                                                                                                                                                                                                                                                                                                                                                       |                                                                           | Education: Ph. D               |                                   | Professional title:                                                                                                                                                                                    |  |
|                                                                                                                                                                                                                                                                                                                                                                                                                                                                                              | Experiment title: Effect of Acupotomy on FAK-PI3K signaling pathways in KOA rabbit articular cartilages                                                                                                                                                                                                                                                                                                                                                                                                                                                                                     |                                                                           |                                |                                   |                                                                                                                                                                                                        |  |
|                                                                                                                                                                                                                                                                                                                                                                                                                                                                                              | Aim of experiment: The research of the effect of needle knife to promote cartilage cell synthesis metabolism mechanism                                                                                                                                                                                                                                                                                                                                                                                                                                                                      |                                                                           |                                |                                   |                                                                                                                                                                                                        |  |
|                                                                                                                                                                                                                                                                                                                                                                                                                                                                                              | Animal cases                                                                                                                                                                                                                                                                                                                                                                                                                                                                                                                                                                                | Source of animal: Beijing Jin Muyang Laboratory Animal Technology Co. Ltd |                                |                                   |                                                                                                                                                                                                        |  |
|                                                                                                                                                                                                                                                                                                                                                                                                                                                                                              |                                                                                                                                                                                                                                                                                                                                                                                                                                                                                                                                                                                             | Species or strain: New Zealand rabbits                                    |                                | Grade: SPF                        |                                                                                                                                                                                                        |  |
|                                                                                                                                                                                                                                                                                                                                                                                                                                                                                              |                                                                                                                                                                                                                                                                                                                                                                                                                                                                                                                                                                                             | Number: 49                                                                |                                | Application date: 2015-06-14      |                                                                                                                                                                                                        |  |
|                                                                                                                                                                                                                                                                                                                                                                                                                                                                                              |                                                                                                                                                                                                                                                                                                                                                                                                                                                                                                                                                                                             | Entering date: 2015-07-04                                                 |                                | Ending date: 2015-09-24           |                                                                                                                                                                                                        |  |
| <p>Outline of experiments: including modeling or surgical methods, observational index, executing animal method et al.</p> <p><b>1. Modeling or surgical methods:</b><br/>Modified Videman left hind leg unbend fixed braking method</p> <p><b>2. Observational index:</b><br/>RT-pcr and Western blot were used to test each animal cartilage p - FAK , p - PI3K, Aggrecan gene and protein expression level</p> <p><b>3. Executing animal method:</b><br/>Executed by over anesthesia.</p> |                                                                                                                                                                                                                                                                                                                                                                                                                                                                                                                                                                                             |                                                                           |                                |                                   |                                                                                                                                                                                                        |  |
| <p>Signature of applicant: 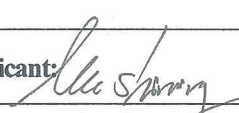 Telephone: 86 - 10 - 13426391690</p>                                                                                                                                                                                                                                                                                                                                          |                                                                                                                                                                                                                                                                                                                                                                                                                                                                                                                                                                                             |                                                                           |                                |                                   |                                                                                                                                                                                                        |  |
| Inspection contents                                                                                                                                                                                                                                                                                                                                                                                                                                                                          | <p>1. Does laboratory animal must be used in the project? Could other methods such as computer simulation, cell culture or using the low-grade animal instead of the high-grade animal? Yes.</p> <p>2. Are the qualification of applicant, species or strain, grade and specifications of animals suitable? Could the quantity of animals be reduced by improving the study design or using high quality animals? Yes</p> <p>3. Could the study design and animal treatment be refined by ameliorating experimental method, adjusting observational index, executing animal method? Yes</p> |                                                                           |                                |                                   |                                                                                                                                                                                                        |  |
| Results of inspection                                                                                                                                                                                                                                                                                                                                                                                                                                                                        | Attitude of the Animal Care & Welfare Committee:                                                                                                                                                                                                                                                                                                                                                                                                                                                                                                                                            |                                                                           | Agree <input type="checkbox"/> | Disagree <input type="checkbox"/> | <p>Stamp: 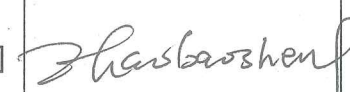</p> <p>Date: 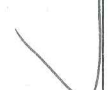</p> |  |
